# Supplementary material for: Stabilizing doped Spiro-OMeTAD with an organic molten salt for efficient and stable perovskite solar cells
Source: Royal Society of Chemistry journal article supplement (doi:10.1039/d4ee04310c), 2024-01-01
Supplement: d4ee04310c1.pdf [file d4ee04310c1.pdf]

## Supporting Information

### **Stabilizing doped Spiro-OMeTAD by organic molten salt for efficient and stable perovskite solar cells**

Tengfei Pan,<sup>1</sup> Zhiwei Li,<sup>1</sup> Biyun Ren,<sup>1</sup> Wan Yang,<sup>1</sup> Xueqin Ran,<sup>1</sup> Yajing Li,<sup>1</sup> Yutian Xu,<sup>1</sup> Yue Wang,<sup>2</sup> Deli Li,<sup>2</sup> Yingdong Xia,<sup>1</sup> Xingyu Gao,<sup>3</sup> Lingfeng Chao,<sup>1\*</sup> Yonghua Chen<sup>1\*</sup>

<sup>1</sup>Key Laboratory of Flexible Electronics (KLoFE) & Institute of Advanced Materials (IAM), School of Flexible Electronics (Future Technologies), Nanjing Tech University (NanjingTech), 30 South Puzhu Road, Nanjing 211816, Jiangsu, China.

<sup>2</sup>Fujian Cross Strait Institute of Flexible Electronics (Future Technologies), Fujian Normal University, Fuzhou 350117, China.

<sup>3</sup>Shanghai Synchrotron Radiation Facility, Shanghai Institute of Applied Physics, Chinese Academy of Sciences, Shanghai 201204, P. R. China.

Tengfei Pan and Zhiwei Li contribute equally.

\*Corresponding author. Email: [iamlfchao@njtech.edu.cn](mailto:iamlfchao@njtech.edu.cn) (L.C.);

[iamyhchen@njtech.edu.cn](mailto:iamyhchen@njtech.edu.cn) (Y.C.)

## **Materials and Methods**

### **Materials**

SnO<sub>2</sub> colloid precursor (tin (iv) oxide, 15% in H<sub>2</sub>O colloidal dispersion) was purchased from Alfa Aesar. PbI<sub>2</sub> (Lead iodide); Spiro-OMeTAD (2, 2', 7, 7'-tetrakis(N, N-di-p-methoxy-phenylamine)-9, 9'-spirobifluorene) were purchased from Advanced Election Technology Company in China. FAI (formamidinium iodide), MACl (methylammonium chloride) was purchased from Great Cell. CY (cyclohexylamine), TFA (trifluoroacetic acid), Ac (acetic acid), DMSO (dimethyl sulfoxide), DMF (N, N-dimethylformamide), tBP (4-tert-butyl pyridine), CB (chlorobenzene), OAI (n-Octylammonium Iodide), LiTFSI (lithium bis(trifluoromethanesulfonyl)imide), IPA (isopropyl alcohol) and were purchased from Sigma-Aldrich. CYI (Cyclohexylamine Hydroiodide) were purchased from Aladdin.

### **Synthesis of CYTFA**

Solution A: Put 8 ml of trifluoroacetic acid into a beaker, and then use 50 ml of anhydrous methanol for dilution. Solution B put 35 ml Cyclohexylamine (33% ethanol solution) into the flask, stir at -16°C, and then dilute with 60 ml of absolute ethanol. After the temperature of solution B is stabilized, solution A is slowly added drop wise to solution B. It is worth noting that during this process, solution B was kept at -16 °C and continuously stirred. Finally, after continuous stirring for 2 hours, the solution was subjected to rotary evaporation at 55 °C to remove the remaining solvent to obtain the product CYTFA.

### **Synthesis of CYAc**

Solution A: Put 6 ml of acetic acid into a beaker, and then use 50 ml of anhydrous methanol for dilution. Solution B put 12 ml Cyclohexylamine (33% ethanol solution) into the flask, stir at -16°C, and then dilute with 60 ml of absolute ethanol. The subsequent synthesis steps are the same as CYTFA.

### **Doping methodology**

The organic molten salt doping of spiro-OMeTAD was prepared by dissolving 72.3 mg spiro-OMeTAD in 1 mL CB and doped with 25  $\mu\text{L}$  LiTFSI salt in acetonitrile ( $520 \text{ mg mL}^{-1}$ ) and 35  $\mu\text{L}$  TBP with different loading of CYTFA, and stirred at room temperature overnight.

### **Device fabrication**

FTO substrates were ultrasonic cleaned sequentially in deionized water and isopropanol for 30 min respectively, and dried by a compressed nitrogen gun. After 30 min UV-Ozone surface treatment, we deposited  $\text{SnO}_2$  ETL by spin coating a 1:3 diluted  $\text{SnO}_2$  nanoparticle water solution at 4,000 rpm for 30 s, followed by annealing at  $150^\circ\text{C}$  for 20 min in air. Afterwards, a thin potassium chloride (KCl, 99 %, Sigma-Aldrich) layer was deposited by spin coating  $1 \text{ mg mL}^{-1}$  KCl deionized water solution at 3,000 rpm for 30 s and annealed at  $100^\circ\text{C}$  for 10 min in air. The perovskite  $\text{FAPbI}_3$  active layer precursor was prepared by mixing 1.81 M  $\text{PbI}_2$ , 1.8M FAI, 0.42M MACL, and dissolved in anhydrous DMF and DMSO with the volume ratio of 8:1 mixed solution. For the recipe with  $1 \text{ mg mL}^{-1}$  Potassium Iodide (KI,  $\geq 99\%$ , Sigma-Aldrich) was added into the perovskite precursors as additive. The perovskite solution was then deposited via spin coating at 5000 rpm for 30 sec (2,000 rpm ramp). Within 10 s of the 5,000-rpm spinning, 1mL of diethyl ether as the antisolvent was deposited onto the film. After spin-coating, the perovskite film was then annealed at  $150^\circ\text{C}$  for 15 min in ambient air. Then the  $5 \text{ mg mL}^{-1}$  OAI solution in IPA was spin-coated onto the perovskite surface at 5000 rpm and annealed at  $100^\circ\text{C}$  for 1 min. Later, the different hole transport layers were deposited by spin coating at 5,000 rpm for 30 s without further annealing. Metal electrode of 80 nm Au was deposited on hole transporting layer through thermal evaporation method under a vacuum degree higher than  $5 \times 10^{-4}$  Torr to accomplish the solar cell fabrication. The solar cells are naturally oxidized in a brown dryer for 22h, and the humidity is controlled at about 5%. A  $0.05 \text{ cm}^2$  shadow mask was used to define the effective working area of the solar cells.

## **Characterizations and measurements**

### **HTL film characterizations**

**Proton nuclear magnetic resonance (NMR)** spectra were measured with a JOEL NMR spectrometer (JNM-ECZ400S, 400 MHz Japan).

**Fourier Transform Infrared (FTIR)** spectroscopy was characterized by FT/IR-6100 (Jasco).

**Scanning electron microscopy (SEM)** analysis was performed on a SU8010 electron microscope. SEM images were captured using a 5-kV acceleration voltage and an aperture size of 20  $\mu\text{m}$ .

**Time-of-flight secondary-ion mass spectrometry (TOF-SIMS)** measurements were carried out to analyse the depth profile. A primary beam ( $\text{Bi}^{3+}$ ) at 30 kV and sputter beam ( $\text{Cs}^+$ ) at 1 kV were used for analysing positive and negative polarities.

**Grazing-incidence wide-angle X-ray scattering (GIWAXS)** was performed at the BL14BL beamline of the Shanghai Synchrotron Radiation Facility (SSRF) using X-ray with a wavelength of 1.24  $\text{\AA}$ .

**Space-charge limited current (SCLC)** measurements were used to determine the hole mobility of pristine and doped HTL films on a hole-only device (FTO/MoO<sub>3</sub> 5nm /Spiro-OMeTAD 180nm/MoO<sub>3</sub> 5nm /70nm Au). The MoO<sub>3</sub> and Au layers were all deposited by thermal evaporation. The classic Mott-Gurney equation was used to determine the mobility:  $J=9\mu\epsilon_0\epsilon_r V^2/(8d^3)$ , where  $\epsilon_r \approx 8.26$  is the average dielectric constant of the blended film,  $\epsilon_0$  is the vacuum permittivity of the free space,  $\mu$  is the hole mobility,  $V$  is the applied bias, and  $d$  is the film thickness.

**Ultraviolet photoelectron spectroscopy (UPS)** was measured by Thermo ESCALAB 250 with a non-monochromated He I $_{\alpha}$  photon source ( $h\nu = 21.22$  eV).

**Steady-state photoluminescence (PL) spectra and Time-resolved photoluminescence (TRPL) spectra** were obtained by FLS1000. The excitation wavelength was set as 520 nm. The TRPL decay data were modeled by a biexponential formula:  $Y=A_1\exp(-t/\tau_1) + A_2\exp(-t/\tau_2)$ .

## Device characterizations

**Charge extraction (CE)** was performed using PAIOS system under different illumination intensity ( $1-100 \text{ mW cm}^{-2}$ ) with an illumination duration of 100 us. Integrating the extraction current over time yields the extracted charge. The extracted charge carrier density  $n_{CE}$  is then calculated according to the following equation:

$$n_{CE} = \frac{1}{Lq} (\int j(t) dt - (V_a - V_e) C_{geom})$$

where  $L$  is the perovskite thickness,  $q$  is the unit charge,  $t_e$  is the extraction time,  $j(t)$  is the transient current density,  $C_{geom}$  is the geometric capacitance,  $V_a$  is the voltage applied prior extraction (in most cases  $V_{oc}$ ), and  $V_e$  is the extraction voltage. The charge on the capacitance needs to be subtracted<sup>17</sup> as only the charge carrier density inside the bulk is of interest.

**Photo-charge extraction by linearly increasing voltage (photo-CELIV)** measurements were performed using a pulsed Nd:YAG laser (Quantel Ultra) operated at 532 nm. The laser pulse generates charges in the solar cells, and a linearly increasing voltage pulse is applied after a short delay to extract the photogenerated charge. A small, steady-state offset voltage (similar to  $V_{bi}$ ) is applied in forward bias to prevent the extraction of photogenerated charges during the delay between the laser pulse and the linearly increasing applied voltage pulse.

**Intensity Modulated Photovoltage Spectroscopy (IMVS)** measurements were made using a PAIOS system developed by Fluxim AG. These measurements were made at different open-circuit voltages by varying the light intensity of a white LED. The frequency range used for the measurements was 1-107 Hz. The AC light intensity perturbation was set to 10% of the DC light intensity.

**Transient photocurrent (TPC)** measurement was performed with a system excited by a 532 nm (1000 Hz, 3.2 ns) pulse laser.

**Transient photovoltage (TPV)** measurement was performed with the same

system excited by a 405 nm (50 Hz, 20 ms) pulse laser. A digital oscilloscope (Tektronix, D4105) was used to record the photocurrent or photovoltage decay process with a sampling resistor of 50  $\Omega$  or 1 M $\Omega$ , respectively.

**Photo current-voltage (J-V)** curves were measured by using 2400 Series Source Meter (Keithley Instruments) under a SS-F5-3A solar simulator (AM 1.5G, 100 mW cm<sup>-2</sup>) (Enlitech) calibrated by a NREL standard Si cell, and no additional UV filter equipment was used. The measurements were carried out with the devices inside the glove box (<0.1 ppm O<sub>2</sub> and H<sub>2</sub>O). To ensure the accuracy of the J<sub>sc</sub> measured from JV scans, a mask with an aperture area of 0.05 cm<sup>2</sup> was covered during the measurement. The J-V curves were scanned by reverse (forward bias (1.3 V) → short circuit (-0.2 V)) or forward (short circuit (-0.2 V) → forward bias (1.3 V)) scan with scan rate of 50 mVs<sup>-1</sup>, and 1 ms delay time.

### **Stability tests**

In order to test the stability of the device, we placed the device without any encapsulation in a N<sub>2</sub>-filled glovebox or for more than 2800 hours. The encapsulation of PSCs devices is using EVA as the encapsulant and using glass as the cover. For hygrothermal stability studies, the devices are stored in a temperature and controlled-humidity cabinet with a transparent glass door. The internal relative temperature and humidity were controlled at the required 55±1°C and 55±3 % humidity. The J-V curves were recorded with a Keithley 2400 source meter and under one sun illumination (AM 1.5G, 100 mW cm<sup>-2</sup>) equipped with 425 W collimated Xenon lamp (EnliTech SS-F5-3A), in which the light intensity was calibrated by the NREL certified silicon solar cell. The operational stability tests were carried out at the MPPT for the unencapsulated devices under AM1.5 illumination (100 mW cm<sup>-2</sup>) in atmosphere N<sub>2</sub> at 30±5 °C. The voltage at the MPPT was automatically applied, and the power output of the devices was tracked.

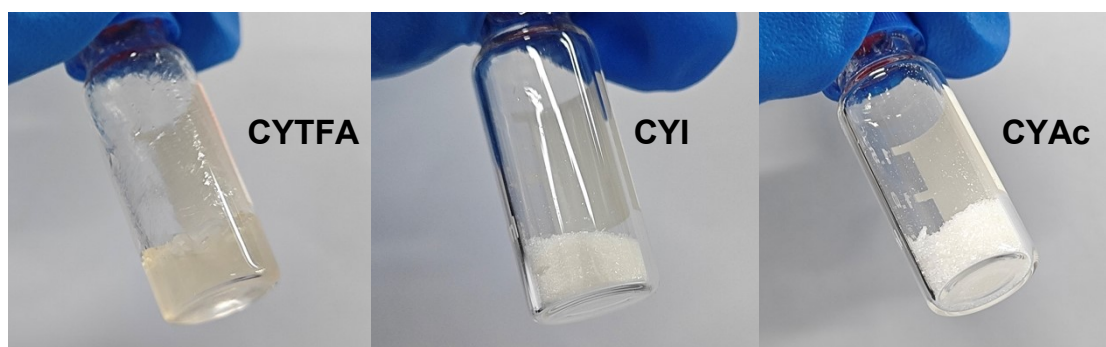

**Fig. S1** Photographs of CYTFA, CYI, and CYAc at 150°C.

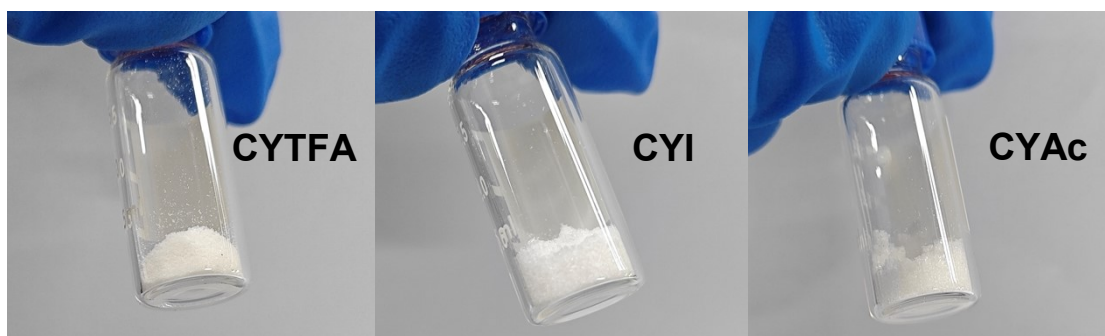

**Fig. S2** Photographs of CYTFA, CYI, and CYAc at room temperature.



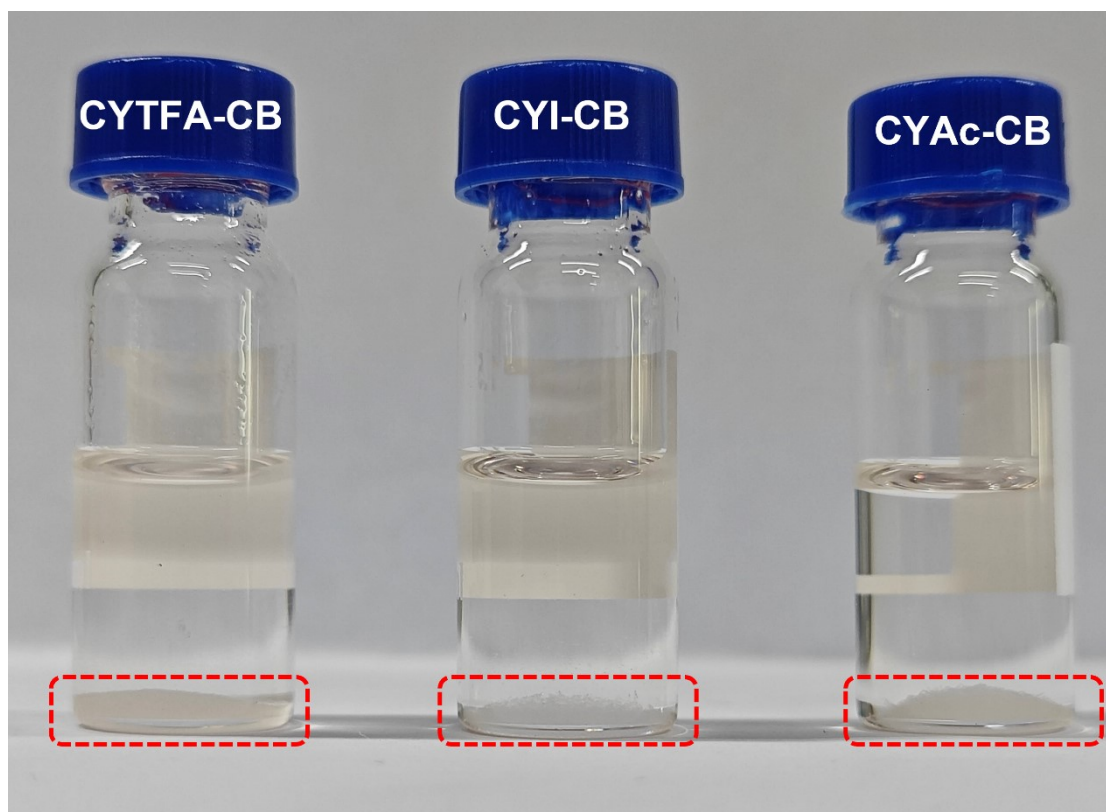

**Fig. S3** Photographs of CYTFA, CYI, and CYAc in CB solutions.

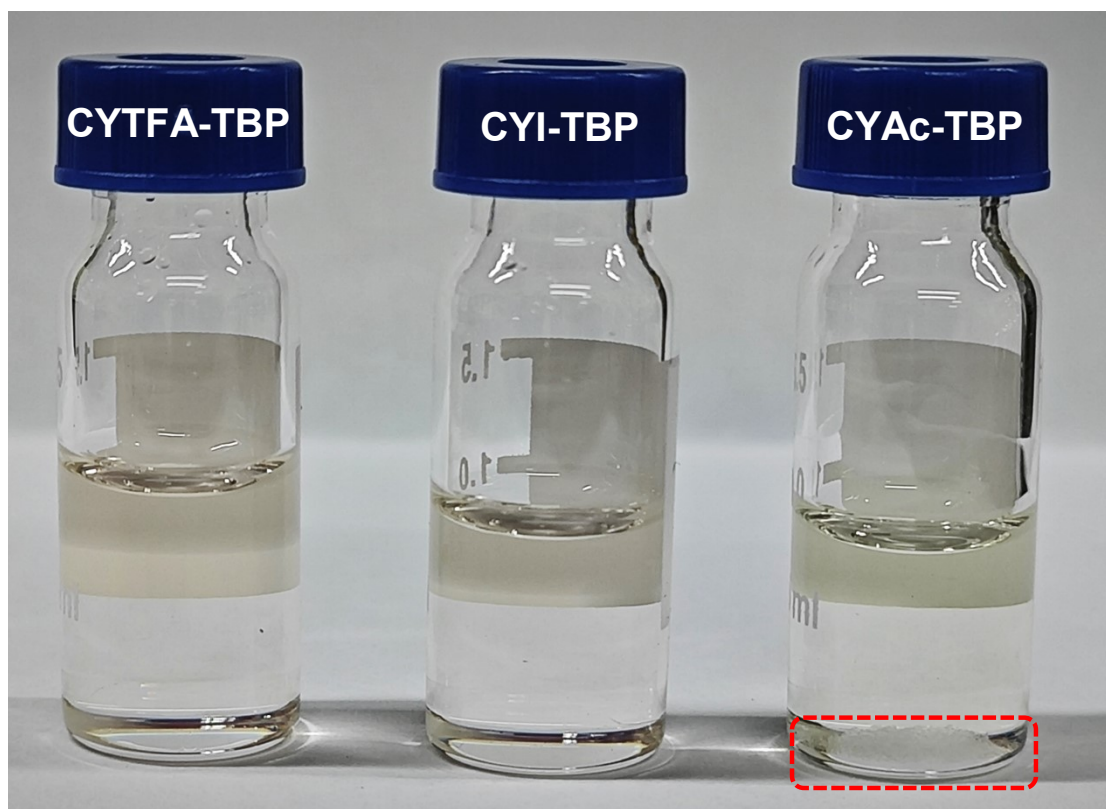

**Fig. S4** Photographs of CYTFA, CYI, and CYAc in TBP solutions.

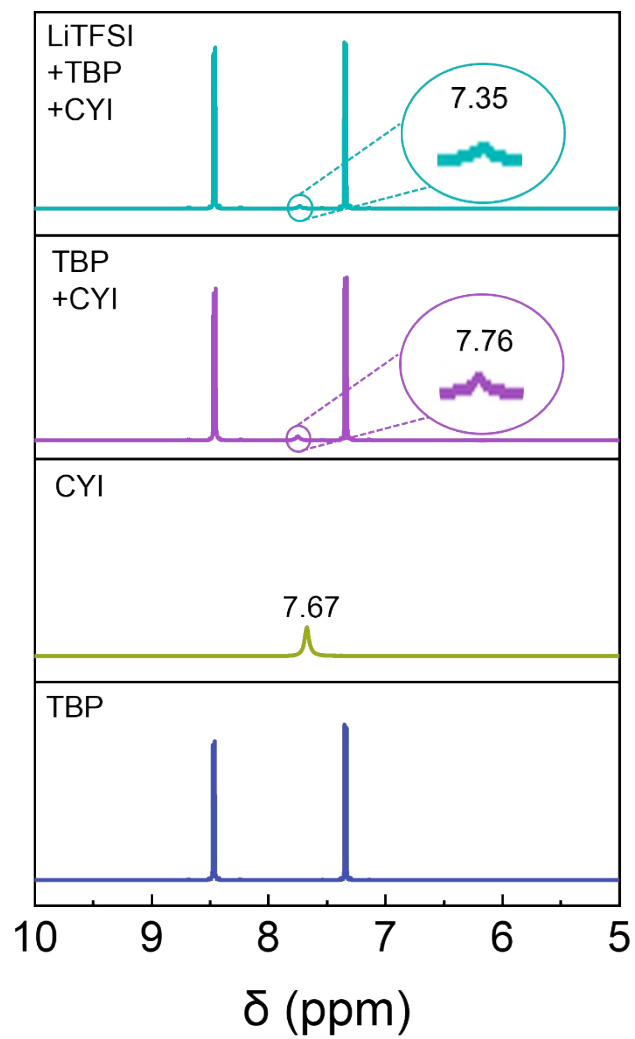

**Fig. S5** <sup>1</sup>H NMR spectra of TBP, CYI, mixed solution of TBP and CYI, and mixed solution of TBP, CYI and LiTFSI.

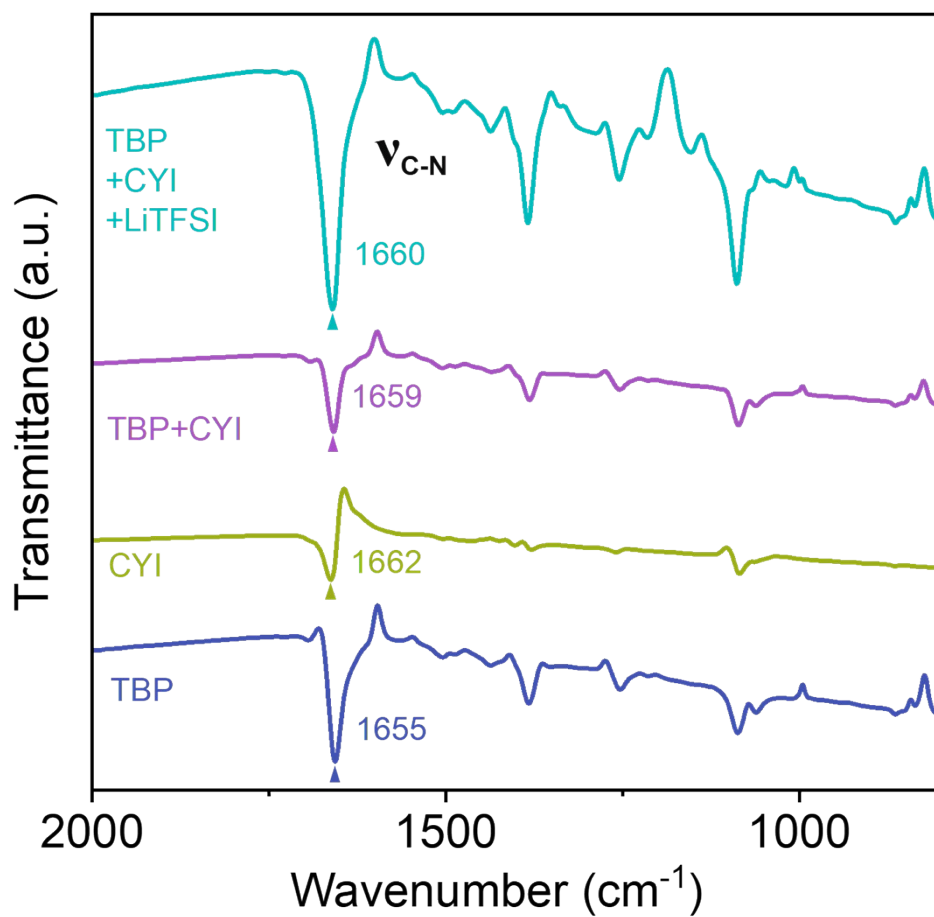

**Fig. S6** FTIR spectra of TBP, CYI, mixed solution of TBP and CYI, and mixed solution of TBP, CYI and LiTFSI at the range of 800cm<sup>-1</sup>-2000 cm<sup>-1</sup>.

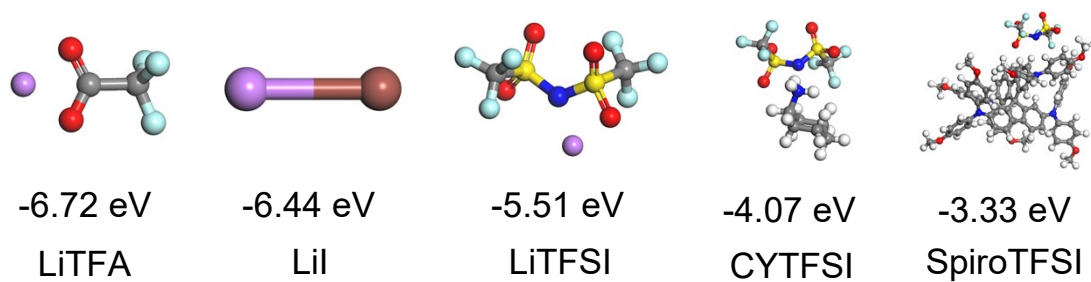

**Fig. S7** Optimized molecular structures and binding energies of LiTFA, LiTFSI, CYTFSI, SpiroTFSI derived from density functional theory calculations.

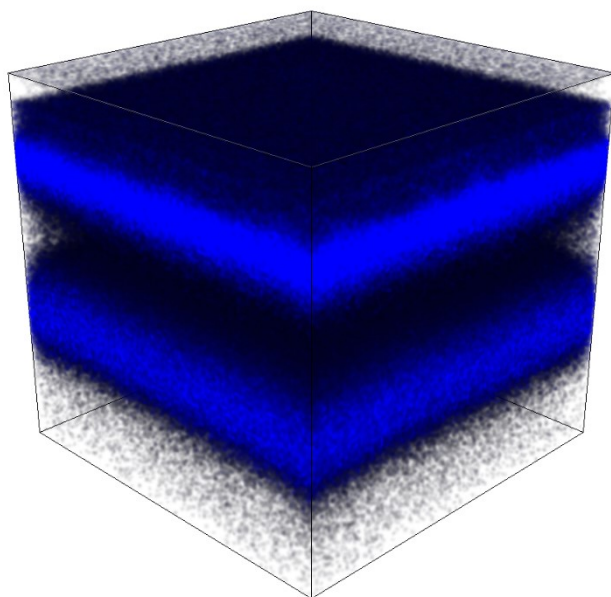

**Fig. S8** TOF-SIMS for depth profiling and corresponding 3D distribution pictures of Li<sup>+</sup> in the CYI-Spiro device.

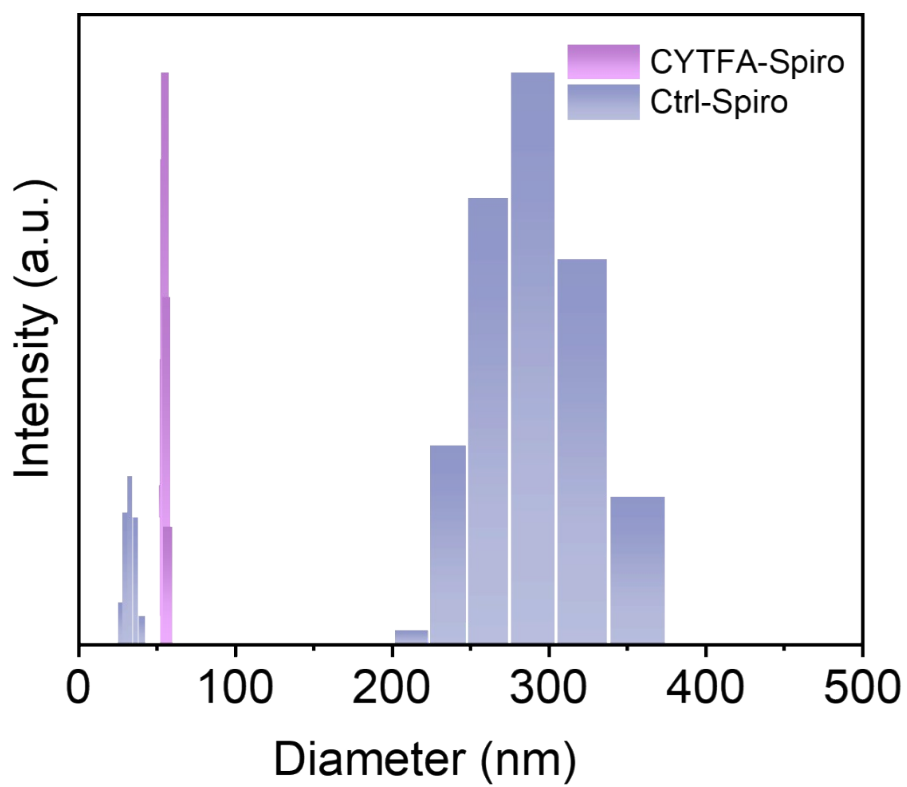

**Fig. S9** Dynamic light scattering spectrum of CYTFA-Spiro and Ctrl-Spiro solution.

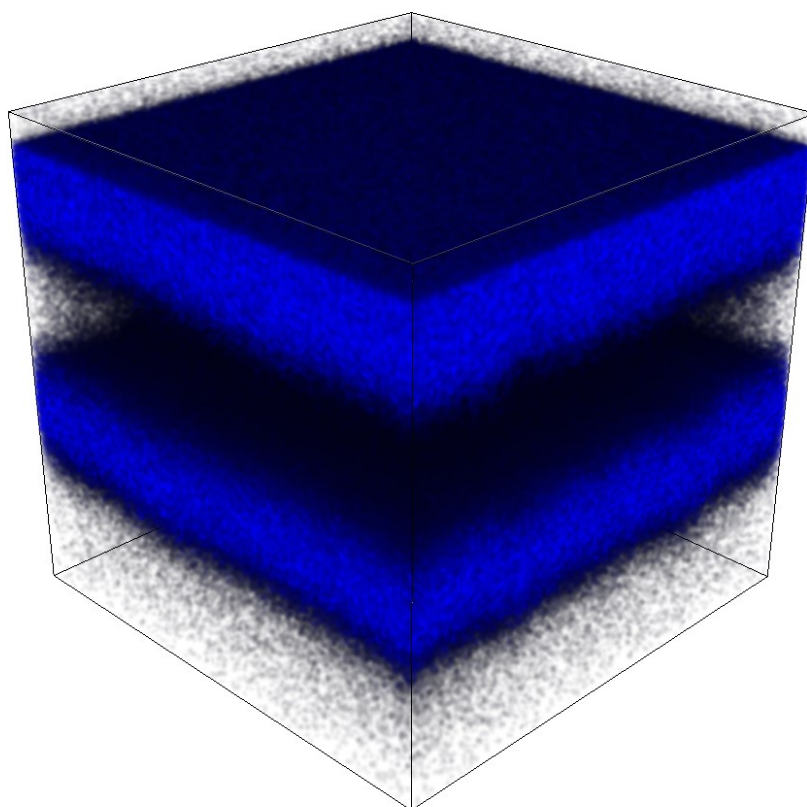

**Fig. S10** TOF-SIMS for depth profiling and corresponding 3D distribution pictures of Li<sup>+</sup> in the Ctrl-Spiro device.



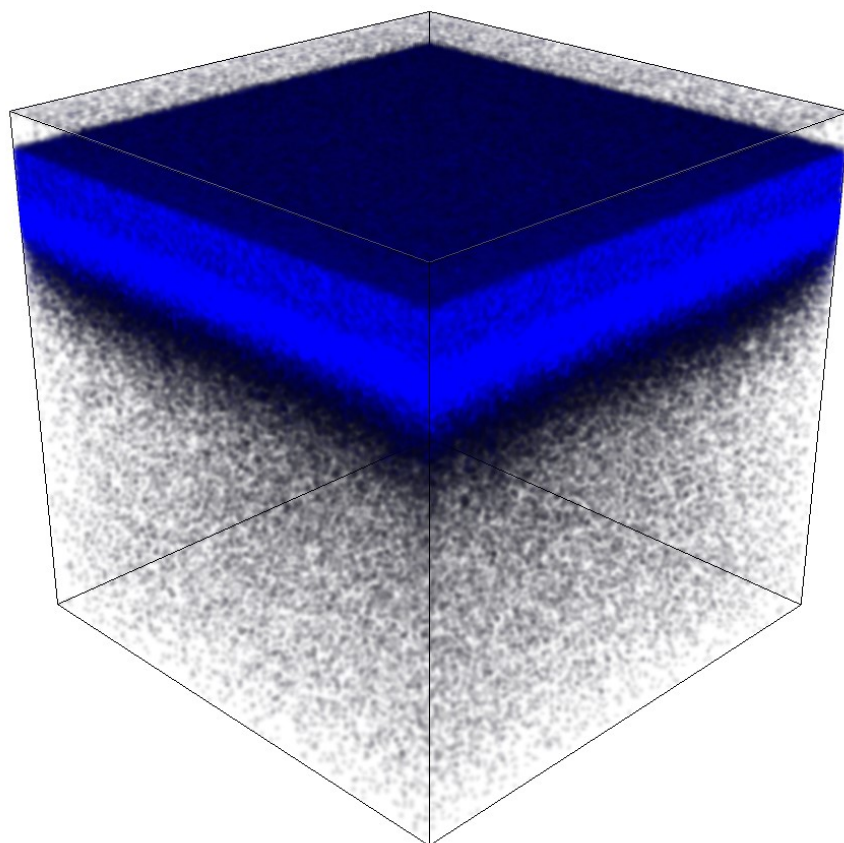

**Fig. S11** TOF-SIMS for depth profiling and corresponding 3D distribution pictures of  $\text{Li}^+$  in the CYTFA-Spiro device.

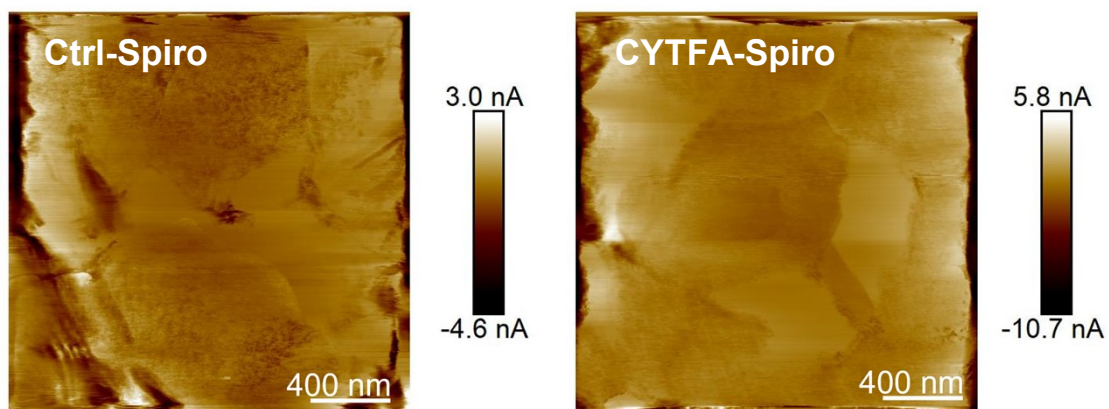

**Fig. S12** C-AFM mapping of Ctrl-Spiro and CYTFA-Spiro thin films on perovskite layer.

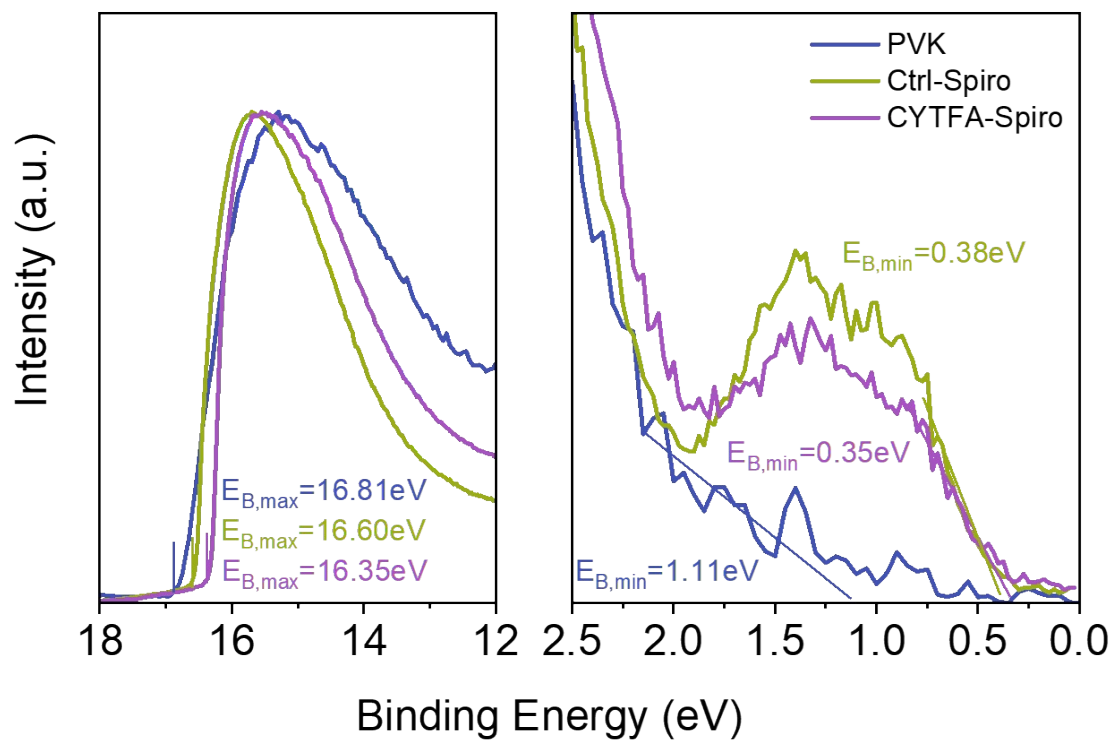

**Fig. S13** UPS characterization of the perovskite, Ctrl-Spiro and CYTFA-Spiro thin films.

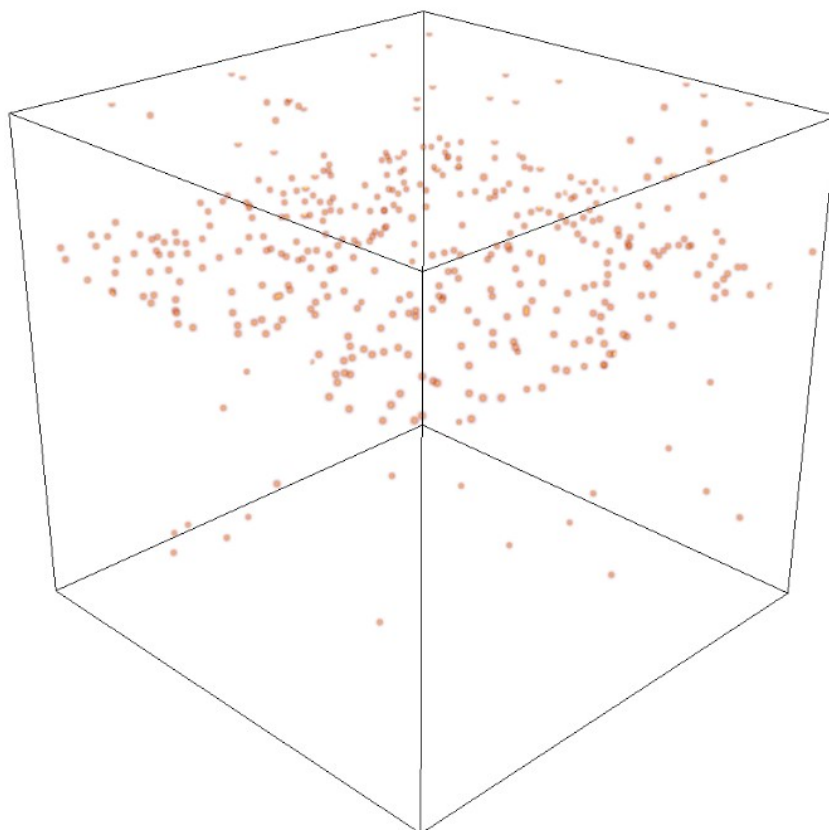

**Fig. S14** TOF-SIMS for depth analyzing of CY<sup>+</sup> in CYTFA-Spiro device.

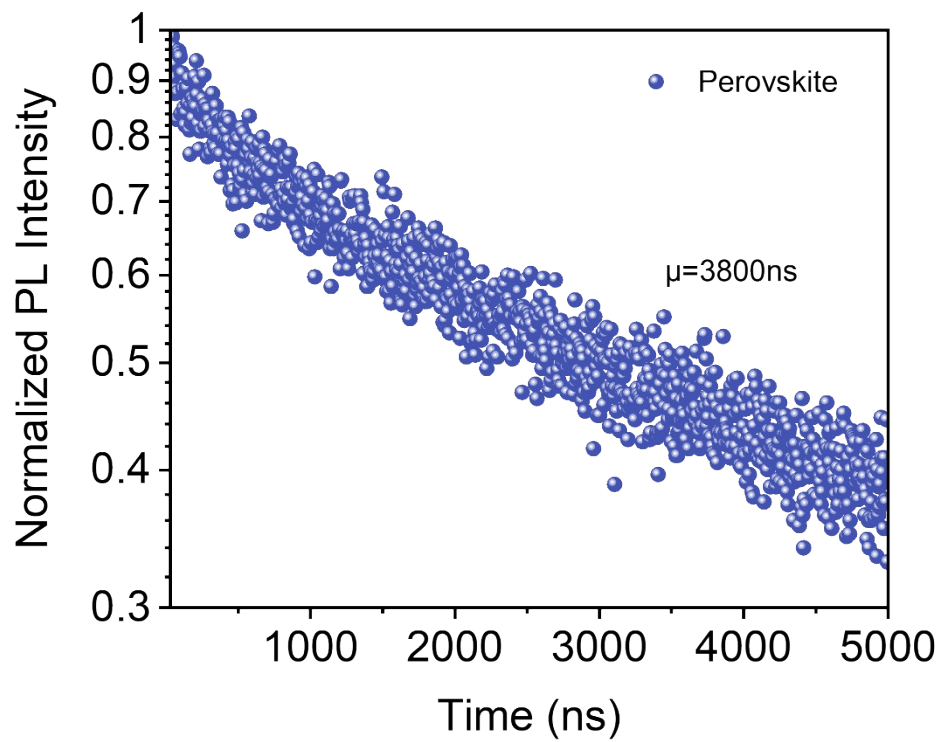

**Fig. S15** TRPL spectra of the perovskite deposited on glass substrates.

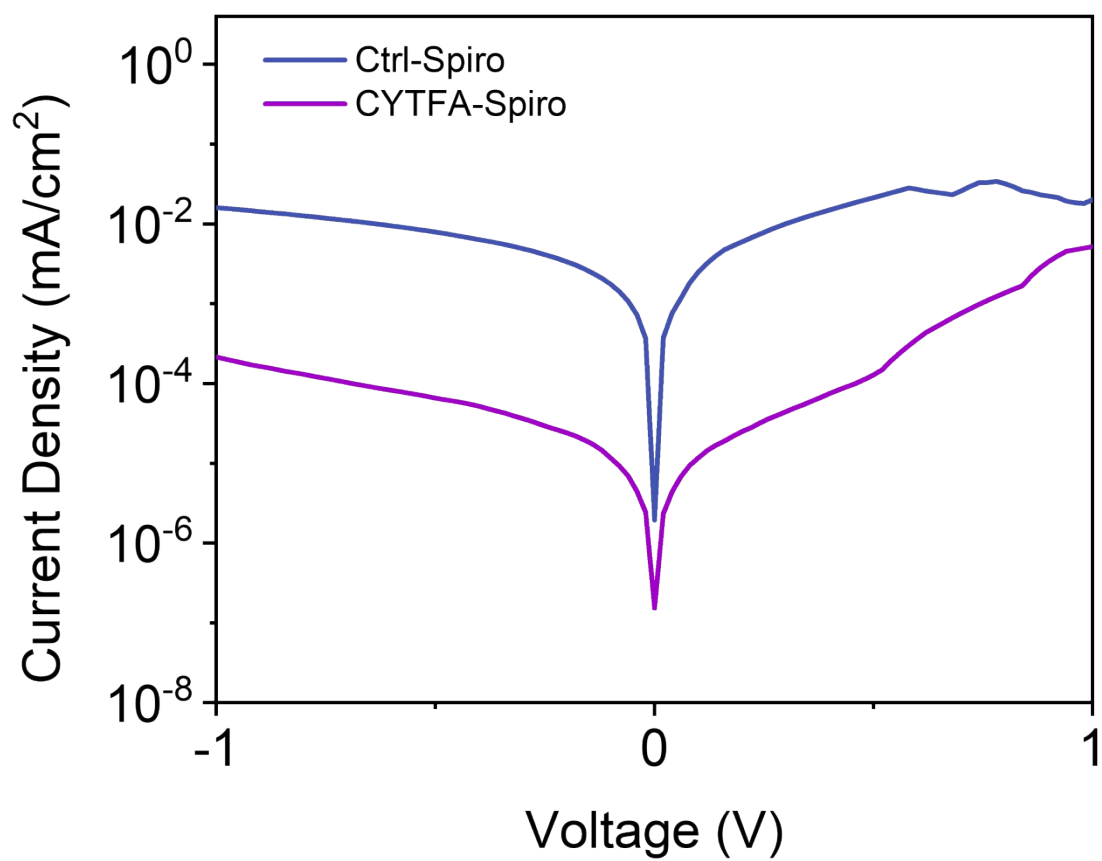

**Fig. S16** Dark J-V curves of the Ctrl-Spiro and CYTFA-Spiro devices.

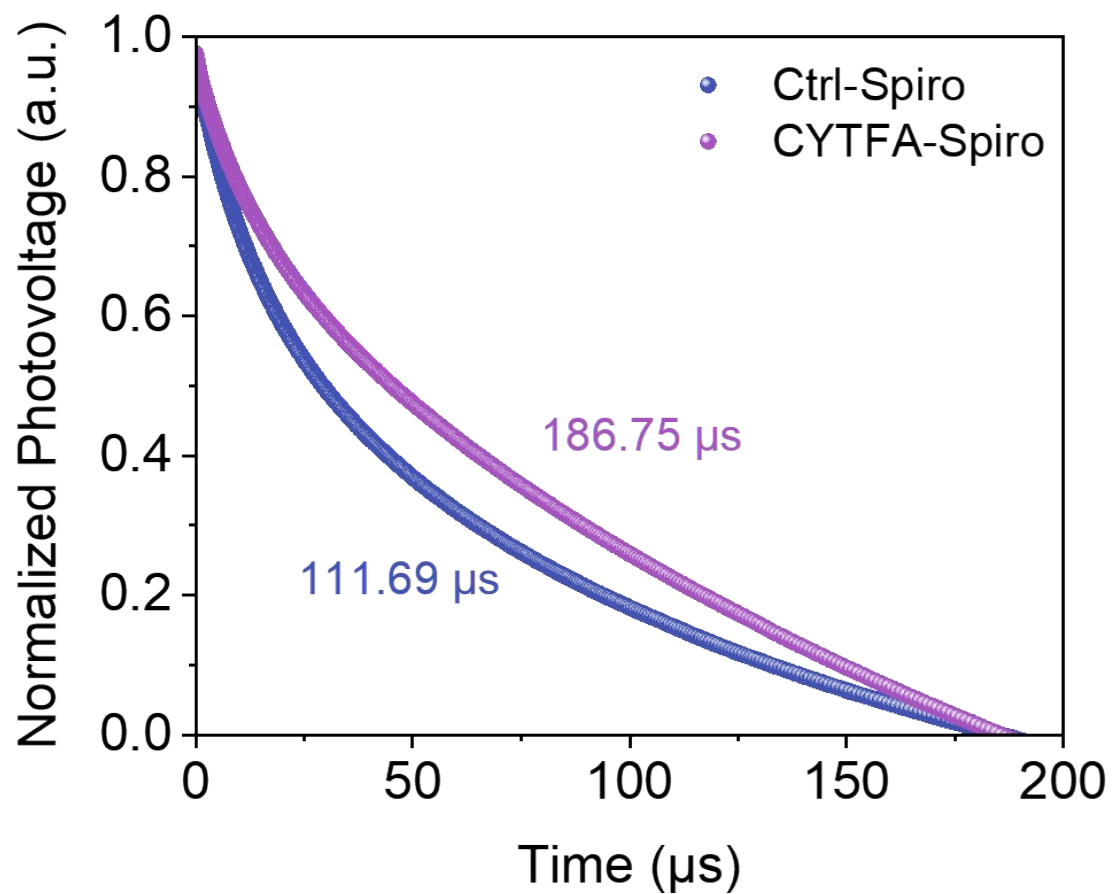

**Fig. S17** TPV of the Ctrl-Spiro and CYTFA-Spiro devices with offset intensity at 8.5%.

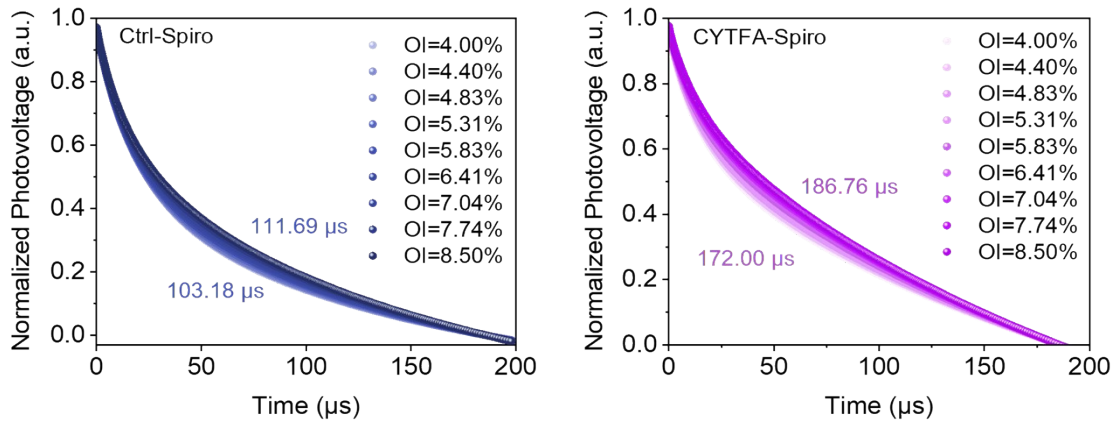

**Fig. S18** TPV of the Ctrl-Spiro and CYTFA-Spiro devices with different offset intensity.



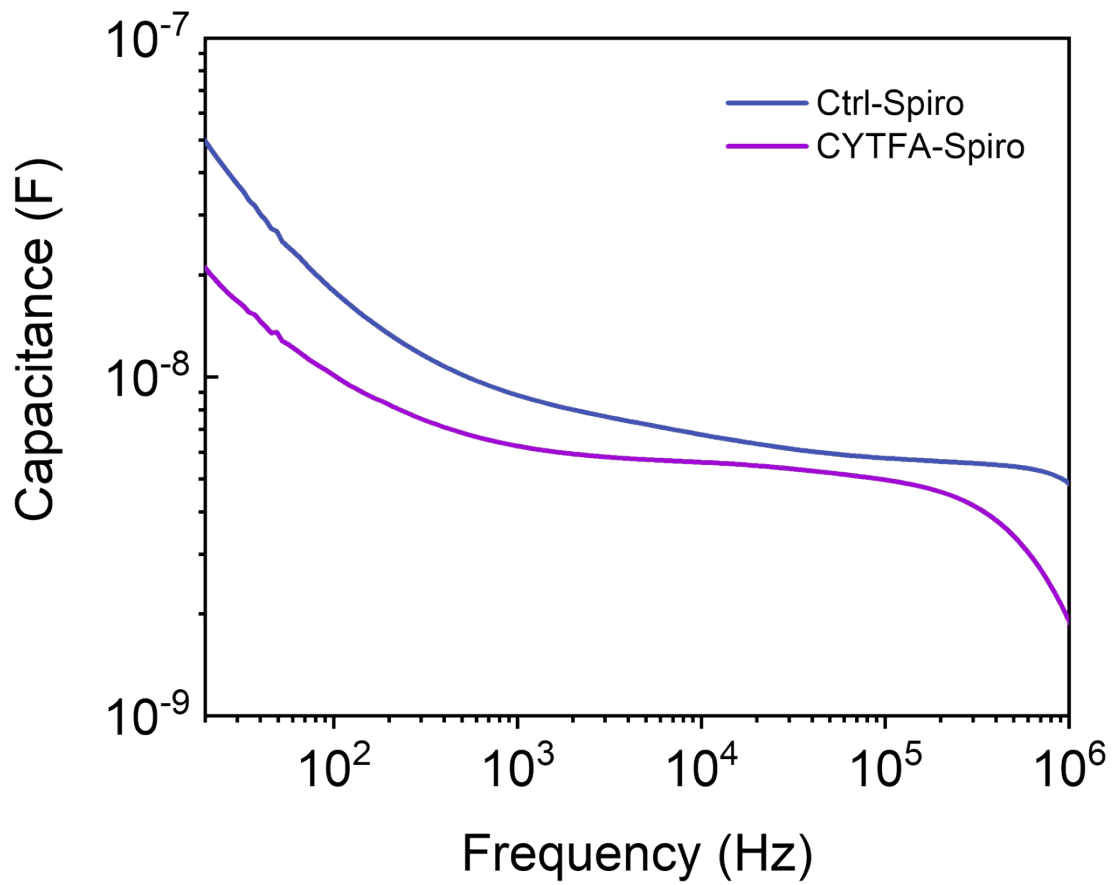

**Fig. S19** Capacitance spectra of the Ctrl-Spiro and CYTFA-Spiro devices.

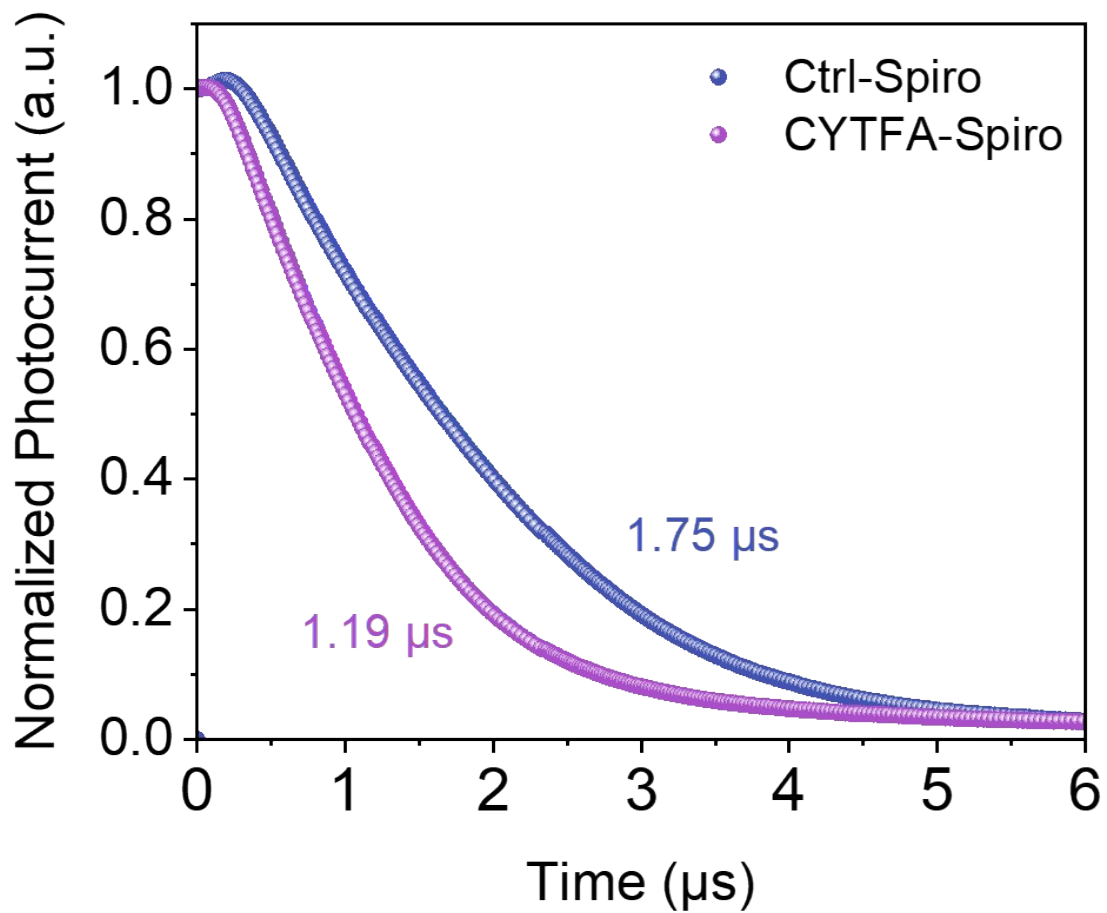

Fig. S20 TPC of the Ctrl-Spiro and CYTFA-Spiro devices with light intensity at 1.

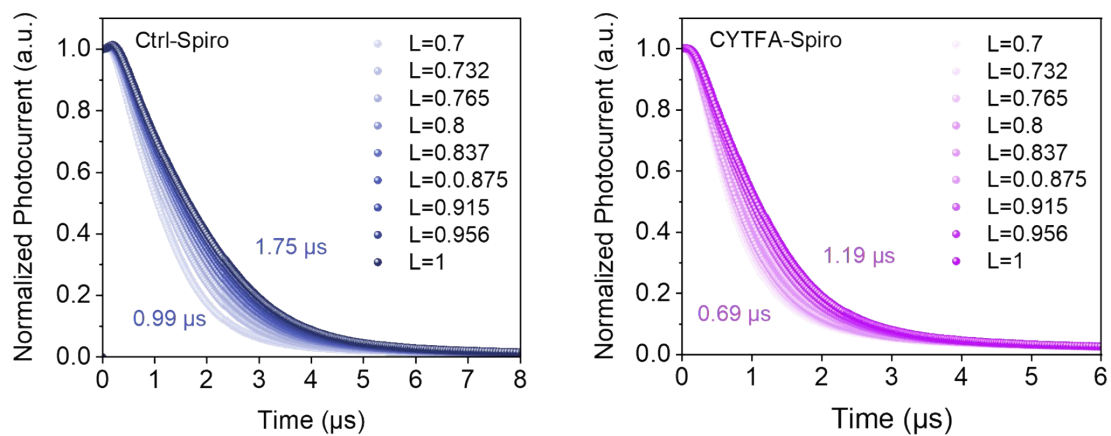

**Fig. S21** TPC of the Ctrl-Spiro and CYTFA-Spiro devices with different light intensities.

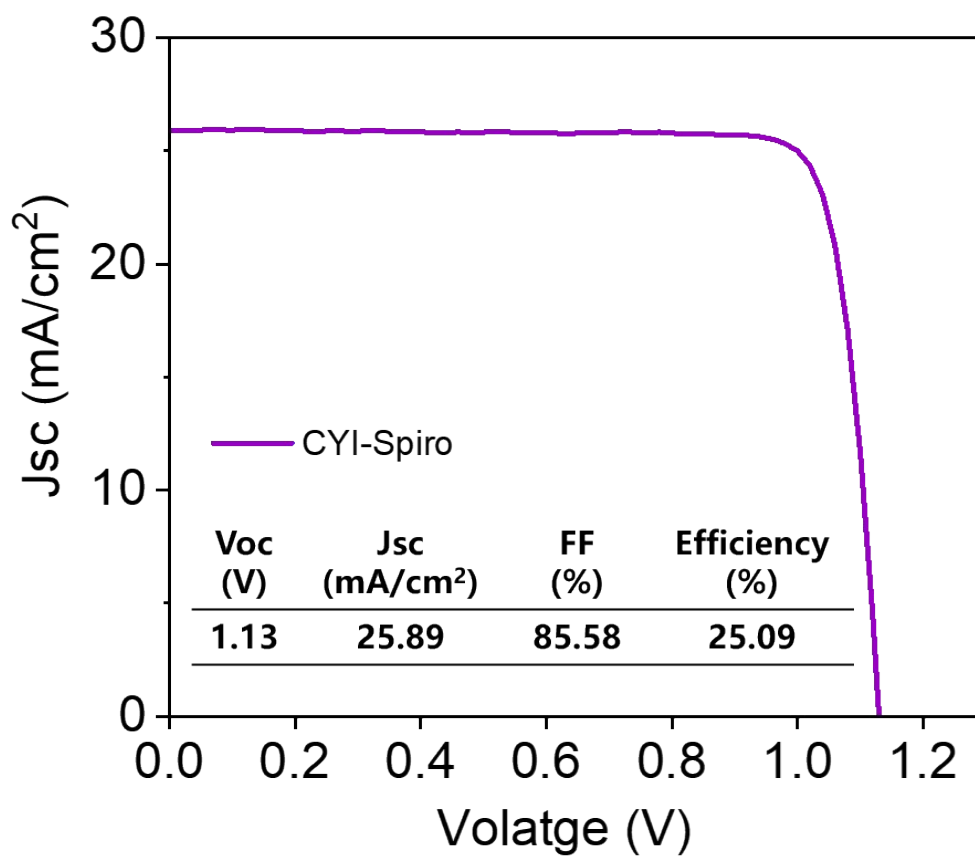

**Fig. S22** Current density-voltage characteristics of the best performance of the CYI-Spiro device.

**Table S1** Summary of doping systems with and without LiTFSI and TBP.

| <b>No LiTFSI and TBP doped system</b>                                                                                                                   |                                                                                                                                                                 |                |                                |                |               |             |
|---------------------------------------------------------------------------------------------------------------------------------------------------------|-----------------------------------------------------------------------------------------------------------------------------------------------------------------|----------------|--------------------------------|----------------|---------------|-------------|
| <b>Molecular</b>                                                                                                                                        | <b>Architecture</b>                                                                                                                                             | <b>PCE (%)</b> | <b>Jsc (mA/cm<sup>2</sup>)</b> | <b>Voc (V)</b> | <b>FF (%)</b> | <b>Ref.</b> |
| Spiro-OMeTAD <sup>2+</sup> (TFSI) <sup>-</sup> <sub>2</sub> ,<br>4-tert-butyl-1-methylpyridinium<br>bis(trifluoromethylsulfonyl)imide                   | FTO/TiO <sub>2</sub> /FAPbI <sub>3</sub> /<br>Spiro-OMeTAD/Au                                                                                                   | 25.01          | 26.49                          | 1.16           | 81.35         | 1           |
| Tetrabutylammonium bis-<br>(trifluoromethanesulfonyl)imide<br>Tetrabutylammonium<br>tetrafluoroborate                                                   | FTO/TiO <sub>2</sub> /<br>Rb <sub>0.05</sub> Cs <sub>0.05</sub> FA <sub>0.8</sub> MA <sub>0.07</sub> PbI <sub>2.57</sub> Br <sub>0.4</sub> /<br>Spiro-OMeTAD/Au | 18.4           | 22.3                           | 1.07           | 77            | 2           |
| Spiro-OMeTAD <sup>2+</sup> (TFSI) <sup>-</sup> <sub>2</sub> ,<br>N,N,N',N'-Tetrakis(4-<br>methoxyphenyl)benzidine<br>bis(trifluoromethanesulfonyl)imide | FTO/TiO <sub>2</sub> /<br>(FA) <sub>0.91</sub> (MA) <sub>0.09</sub> Pb(I <sub>3</sub> ) <sub>0.91</sub> (Br <sub>3</sub> ) <sub>0.09</sub> /<br>Spiro-OMeTAD/Au | 13.15          | 19.62                          | 0.96           | 70            | 3           |
| Spiro-OMeTAD <sup>2+</sup> (TFSI) <sup>-</sup> <sub>2</sub>                                                                                             | FTO/TiO <sub>2</sub> /<br>Rb <sub>0.05</sub> Cs <sub>0.05</sub> FA <sub>0.8</sub> MA <sub>0.07</sub> PbI <sub>2.57</sub> Br <sub>0.4</sub> /<br>Spiro-OMeTAD/Au | 19.3           | 23.9                           | 1.08           | 75            | 4           |
| <b>LiTFSI and TBP doped system</b>                                                                                                                      |                                                                                                                                                                 |                |                                |                |               |             |
| <b>molecular</b>                                                                                                                                        | <b>Architecture</b>                                                                                                                                             | <b>PCE (%)</b> | <b>Jsc (mA/cm<sup>2</sup>)</b> | <b>Voc (V)</b> | <b>FF (%)</b> | <b>Ref.</b> |
| 1-dodecanethiol                                                                                                                                         | ITO/SnO <sub>2</sub> /<br>Cs <sub>0.05</sub> FA <sub>0.81</sub> MA <sub>0.14</sub> PbI <sub>2.55</sub> Br <sub>0.45</sub> /<br>PMMA/spiro-OMeTAD /Au            | 23.1           | 24.6                           | 1.15           | 81.13         | 5           |
| CO <sub>2</sub>                                                                                                                                         | ITO/SnO <sub>2</sub> /<br>Cs <sub>0.05</sub> FA <sub>0.81</sub> MA <sub>0.14</sub> PbI <sub>2.55</sub> Br <sub>0.45</sub> /<br>Spiro-OMeTAD/Au                  | 19.1           | 21.2                           | 1.14           | 79.00         | 6           |
| 12-crown-4                                                                                                                                              | ITO/SnO <sub>2</sub> /<br>Cs <sub>0.05</sub> FA <sub>0.85</sub> MA <sub>0.1</sub> Pb(I <sub>0.97</sub> Br <sub>0.03</sub> ) <sub>3</sub><br>/ Spiro-OMeTAD/Au   | 23.23          | 24.97                          | 1.14           | 81.35         | 7           |
| ferrocene                                                                                                                                               | FTO/SnO <sub>2</sub> /(FAPbI <sub>3</sub> ) <sub>0.99</sub> (MAPb<br>Br <sub>3</sub> ) <sub>0.01</sub> / Spiro-OMeTAD/Au                                        | 23.45          | 25.26                          | 1.15<br>3      | 80.50         | 8           |
| 1,6-diazidohexane                                                                                                                                       | Cs <sub>0.05</sub> FA <sub>0.85</sub> MA <sub>0.1</sub> PbI <sub>3</sub>                                                                                        | 22.7           | 24.7                           | 1.17           | 76.00         | 9           |
| <b>Cyclohexylamine Trifluoroacetic<br/>acid (Our Work)</b>                                                                                              | <b>FTO/FAPbI<sub>3</sub>/Spiro-<br/>OMeTAD/MoO<sub>3</sub>/Au</b>                                                                                               | <b>25.8</b>    | <b>26.14</b>                   | <b>1.17</b>    | <b>84.10</b>  |             |

**Table S2** The relative PL decay time ( $\tau_{\text{PL}}$ ), the estimated charge carrier transfer

| <b>Perovskite materials</b> | <b>Species</b>         | <b><math>\tau_{\text{PL}}</math> (ns)</b> | <b><math>\tau_{\text{CT}}</math> (ns)</b> | <b><math>\eta</math> (%)</b> |
|-----------------------------|------------------------|-------------------------------------------|-------------------------------------------|------------------------------|
|                             | perovskite             | 3800                                      |                                           |                              |
| FAPbI <sub>3</sub>          | Perovskite/Ctrl- Spiro | 65.89                                     | 67.05                                     | 98.27                        |
|                             | Perovskite/CYTFA-Spiro | 12.37                                     | 12.41                                     | 99.68                        |

time ( $\tau_{\text{CT}}$ ) and efficiency ( $\eta$ ) from the TRPL results

**Table S3** The parameters of champion devices based on Ctrl-Spiro and CYTFA-Spiro.

| <b>Devices</b>     | <b>V<sub>oc</sub> (V)</b> | <b>J<sub>sc</sub> (mA/cm<sup>2</sup>)</b> | <b>FF (%)</b> | <b>PCE (%)</b> |
|--------------------|---------------------------|-------------------------------------------|---------------|----------------|
| <b>Ctrl-Spiro</b>  | 1.10                      | 25.22                                     | 82.34         | 23.02          |
| <b>CYTFA-Spiro</b> | 1.17                      | 26.14                                     | 84.10         | 25.80          |

## References

1. T. K. Zhang, F. Wang, H. B. Kim, I. W. Choi, C. F. Wang, E. Cho, R. Konefal, Y. Puttison, K. Terado, L. Kobera, M. Y. Chen, M. Yang, S. Bai, B. W. Yang, J. J. Suo, S. C. Yang, X. J. Liu, F. Fu, H. Yoshida, W. M. M. Chen, J. Brus, V. Coropceanu, A. Hagfeldt, J. L. Brédas, M. Fahlman, D. S. Kim, Z. J. Hu and F. Gao, *Science*, 2022, **377**, 495-501.
2. J. B. Zhang, T. Zhang, L. C. Jiang, U. Bach and Y. B. Cheng, *Acs Energy Letters*, 2018, **3**, 1677-1682.
3. W. Zhang, F. G. Zhang, B. Xu, Y. Y. Li, L. Q. Wang, B. B. Zhang, Y. Guo, J. M. Gardner, L. C. Sun and L. Kloo, *ACS Appl. Mater. Interfaces*, 2020, **12**, 33751-33758.
4. B. Tan, S. R. Raga, A. S. R. Chesman, S. O. Furer, F. Zheng, D. P. McMeekin, L. C. Jiang, W. X. Mao, X. F. Lin, X. M. Wen, J. F. Lu, Y. B. Cheng and U. Bach, *Adv. Energy Mater.*, 2019, **9**, 10.
5. X. Liu, B. L. Zheng, L. Shi, S. J. Zhou, J. T. Xu, Z. H. Liu, J. S. Yun, E. Choi, M. Zhang, Y. H. Lv, W. H. Zhang, J. L. Huang, C. X. Li, K. W. Sun, J. Seidel, M. R. He, J. Peng, X. J. Hao and M. Green, *Nat. Photonics*, 2023, **17**, 96.
6. J. M. Kong, Y. Shin, J. A. Röhr, H. Wang, J. Meng, Y. S. Wu, A. Katzenberg, G. Kim, D. Y. Kim, T. D. Li, E. Chau, F. Antonio, T. Siboonruang, S. Kwon, K. Lee, J. R. Kim, M. A. Modestino, H. L. Wang and A. D. Taylor, *Nature*, 2021, **594**, 51-56.
7. Y. Shen, K. M. Deng, Q. H. Chen, G. Gao and L. Li, *Adv. Mater.*, 2022, **34**, 9.
8. T. Webb, X. P. Liu, R. J. E. Westbrook, S. Kern, M. T. Sajjad, S. Jenatsch, K. Jayawardena, W. H. K. Perera, I. P. Marko, S. Sathasivam, B. W. Li, M. Yavari, D. J. Scurr, M. R. Alexander, T. J. Macdonald, S. A. Haque, S. J. Sweeney and W. Zhang, *Adv. Energy Mater.*, 2022, **12**, 14.
9. Y. P. Han, G. Zhang, H. B. Xie, T. F. Kong, Y. H. Li, Y. Zhang, J. Song and D. Q. Bi, *Nano Energy*, 2022, **96**, 7.
